# Supplementary material for: Development and performance evaluation of a deep learning lung nodule detection system
Source: Springer Nature journal article supplement (doi:10.1186/s12880-022-00938-8), 2022-11-22
Supplement: 12880_2022_938_MOESM2_ESM.pdf [file 12880_2022_938_MOESM2_ESM.pdf]

Criterion 1

Criterion 2

Group 1

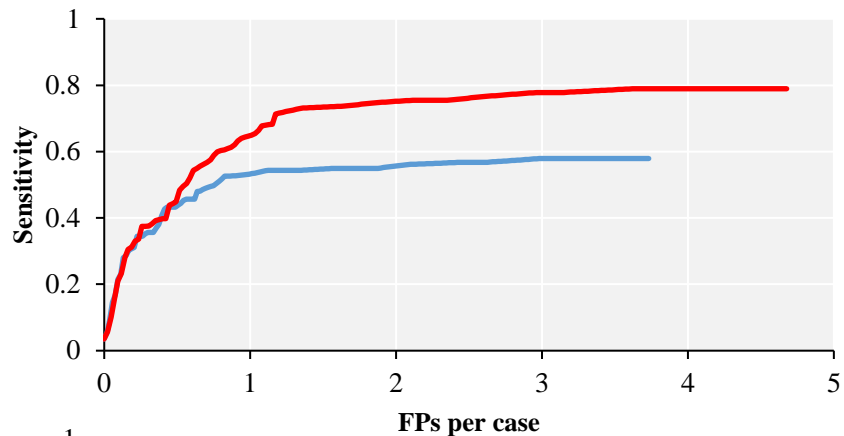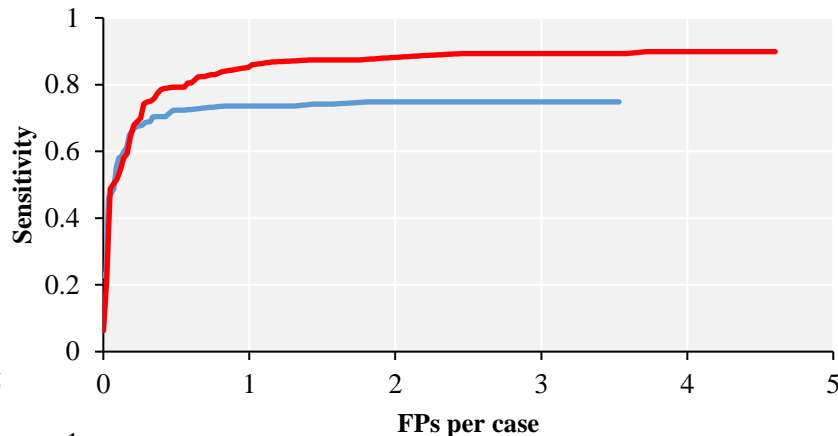

Group 2

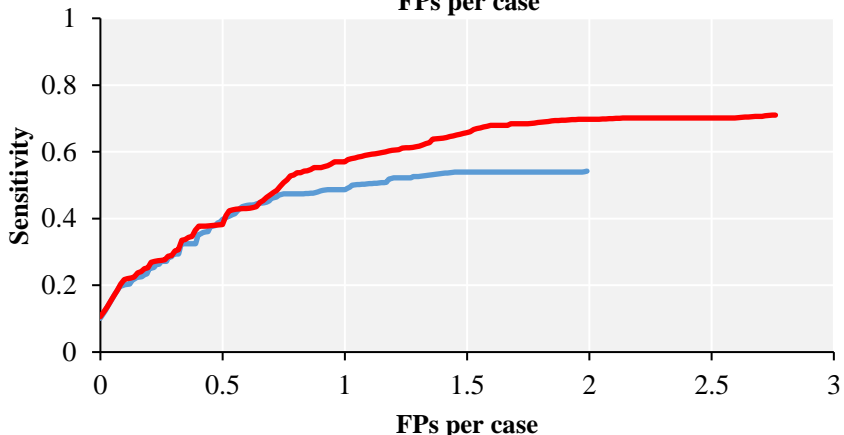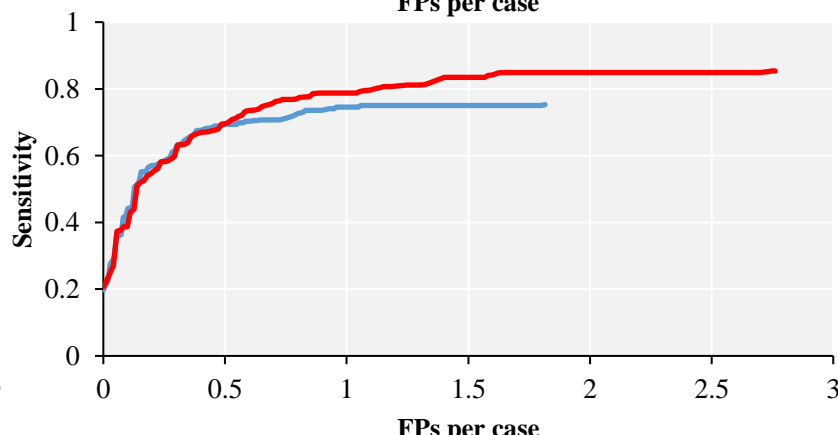

Group 3

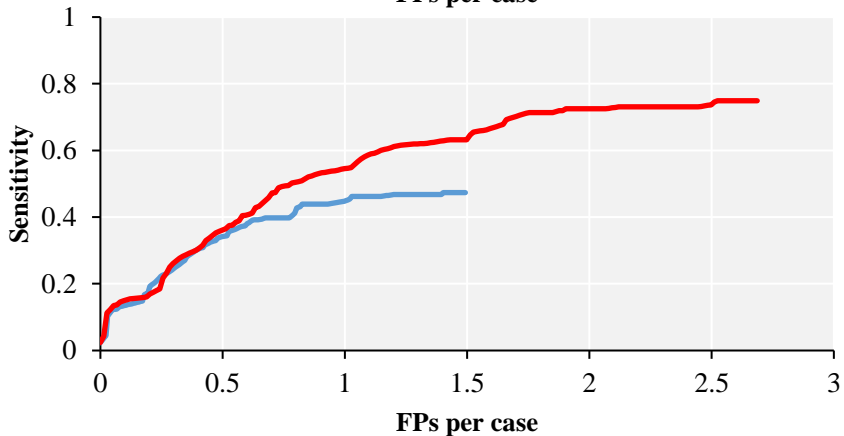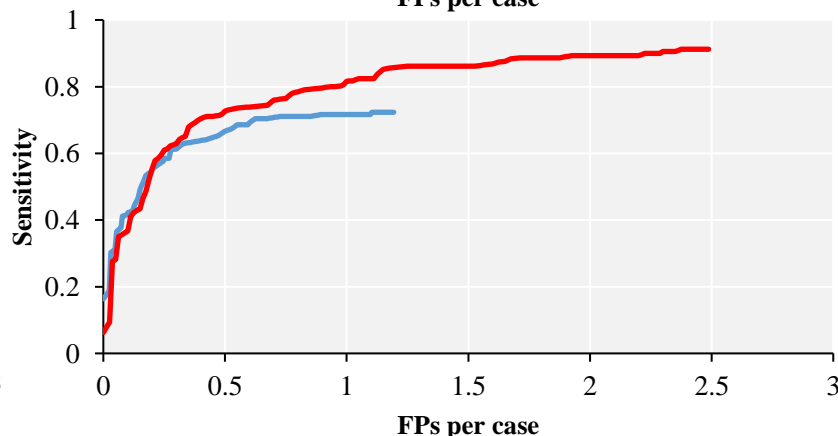

Without CAD  
With CAD
